# Supplementary material for: Semiparametric efficient estimation of genetic relatedness with machine learning methods
Source: Research Square preprint supplement (doi:10.21203/rs.3.rs-4314575/v1), 2024-04-29
Supplement: Supplementary file 1 [file 95c9815e5a7771b514867ee3.pdf]

# Supplementary Materials for Semiparametric efficient estimation of genetic relatedness with machine learning methods

Xu Guo<sup>1</sup>, Yiyuan Qian<sup>1</sup>, Hongwei Shi<sup>1</sup>, Weichao Yang<sup>1</sup> and Niwen Zhou<sup>2\*</sup>

<sup>1</sup> School of Statistics, Beijing Normal University, Beijing, China

<sup>2</sup> Faculty of Arts and Sciences, Beijing Normal University, Zhuhai, China

*Notation:* For two positive sequences  $a_n$  and  $b_n$ ,  $a_n \lesssim b_n$  means  $a_n \leq Cb_n$  for all  $n$ ,  $a_n \gtrsim b_n$  if  $b_n \lesssim a_n$  and  $a_n \asymp b_n$  if  $a_n \lesssim b_n$  and  $a_n \gtrsim b_n$ .  $C$  is used to denote generic positive constants that may vary from place to place. What's more, we denote  $a_n \lesssim_P b_n$  to represent  $a_n \lesssim b_n$  in probability.

**Proof of Theorem 1:** Denote  $\mathcal{P}$  as the distribution of  $O = (X^\top, Y^*, Z^*, T_y, T_z)^\top$ . For better illustration, we can rewrite  $I$  as

$$I = \Psi(\mathcal{P}) = E_{\mathcal{P}}\{[E_{\mathcal{P}}(Y|X) - E_{\mathcal{P}}(Y)][E_{\mathcal{P}}(Z|X) - E_{\mathcal{P}}(Z)]\}.$$

Note that the indicator variables  $T_y$  and  $T_z$  are independent of  $(X, Y, Z)$ . Thus we have  $E_{\mathcal{P}}(Y|X) = E_{\mathcal{P}}(Y^*|X, T_y = 1)$  and  $E_{\mathcal{P}}(Y) = E_{\mathcal{P}}(Y^*|T_y = 1)$ . The case for  $Z$  is similar. Thus, it follows that

$$I = \Psi(\mathcal{P}) = E_{\mathcal{P}}\{[E_{\mathcal{P}}(Y^*|X, T_y = 1) - E_{\mathcal{P}}(Y^*|T_y = 1)][E_{\mathcal{P}}(Z^*|X, T_z = 1) - E_{\mathcal{P}}(Z^*|T_z = 1)]\}.$$

Consider the following parametric submodel indexed by  $t$ , i.e.

$$\mathcal{P}_t = t\tilde{\mathcal{P}} + (1 - t)\mathcal{P},$$

where  $t \in [0, 1]$ , and  $\tilde{\mathcal{P}}$  is a point mass at a single observation  $\tilde{o} = (\tilde{x}^\top, \tilde{y}^*, \tilde{z}^*, \tilde{t}_y, \tilde{t}_z)^\top$ . As mentioned in Hines et al. (2022), the efficient influence function (EIF) for  $I$  at observation  $\tilde{o}$  directly as

$$\phi(\tilde{o}, \mathcal{P}) = \left. \frac{d\Psi(\mathcal{P}_t)}{dt} \right|_{t=0},$$

where  $\Psi(\mathcal{P}_t) = E_{\mathcal{P}_t}\{[E_{\mathcal{P}_t}(Y^*|X, T_y = 1) - E_{\mathcal{P}_t}(Y^*|T_y = 1)][E_{\mathcal{P}_t}(Z^*|X, T_z = 1) - E_{\mathcal{P}_t}(Z^*|T_z = 1)]\}$ .

Denote  $m_t^*(X) = E_{\mathcal{P}_t}\{[E_{\mathcal{P}_t}(Y^*|X, T_y = 1) - E_{\mathcal{P}_t}(Y^*|T_y = 1)]\}$  and  $h_t^*(X) = [E_{\mathcal{P}_t}(Z^*|X, T_z = 1) - E_{\mathcal{P}_t}(Z^*|T_z = 1)]$ . Further, the operator,  $\partial_t$ , applied to an arbitrary function  $g(t)$ , is defined as

$$\partial_t g(t) = \left. \frac{dg(t)}{dt} \right|_{t=0}.$$

Simple calculation entails that

$$\partial_t \Psi(\mathcal{P}_t) = E_{\mathcal{P}}\{\partial_t[m_t^*(X)h_t^*(X)]\} + m_0^*(\tilde{x})h_0^*(\tilde{x}) - \Psi(\mathcal{P}).$$

By the facts that

$$\partial_t E_{\mathcal{P}_t}(Y^*|X, T_y = 1) = \frac{\mathbb{I}_{(\tilde{x}, \tilde{t}_y)}(X, T_y = 1)}{f(X, T_y = 1)}[\tilde{y}^* - E(Y^*|X, T_y = 1)],$$

and

$$\partial_t E_{\mathcal{P}_t}(Y|T_y = 1) = \frac{\mathbb{I}_{\tilde{t}_y}(T_y = 1)}{\Pr(T_y = 1)}[\tilde{y}^* - E(Y^*|T_y = 1)],$$

we have

$$\begin{aligned} E_{\mathcal{P}}\{\partial_t[m_t^*(X)]h_0^*(X)\} &= \int \frac{\mathbb{I}_{(\tilde{x}, \tilde{t}_y)}(X, T_y = 1)}{f(X, T_y = 1)}[\tilde{y}^* - E(Y^*|X, T_y = 1)]h_0^*(X)f(X)dX \\ &= \frac{\mathbb{I}_{\tilde{t}_y}(T_y = 1)}{\Pr(T_y = 1|\tilde{x})}[\tilde{y}^* - E(Y^*|\tilde{x}, T_y = 1)]h_0^*(\tilde{x}), \end{aligned}$$

where the first equation holds because  $E[h_0^*(X)] = 0$ . Note that  $T_y \perp X$ , we have  $\Pr(T_y = 1|X) = \Pr(T_y = 1)$ , which implies that

$$E_{\mathcal{P}}\{\partial_t[m_t^*(X)]h_0^*(X)\} = \frac{\mathbb{I}_{\tilde{t}_y}(T_y = 1)}{\Pr(T_y = 1)}[\tilde{y}^* - E(Y^*|\tilde{x}, T_y = 1)]h_0^*(\tilde{x}).$$

Hence, by the chain rule and the quotient rule for derivatives, we obtain

$$\begin{aligned} E_{\mathcal{P}}\{\partial_t[m_t^*(X)h_t^*(X)]\} &= \frac{\mathbb{I}_{\tilde{t}_y}(T_y = 1)}{\Pr(T_y = 1)}[\tilde{y}^* - E(Y^*|\tilde{x}, T_y = 1)][E(Z^*|\tilde{x}, T_z = 1) - E(Z^*|T_z = 1)] \\ &\quad + \frac{\mathbb{I}_{\tilde{t}_z}(T_z = 1)}{\Pr(T_z = 1)}[\tilde{z} - E(Z^*|\tilde{x}, T_z = 1)][E(Y^*|\tilde{x}, T_y = 1) - E(Y^*|T_y = 1)]. \end{aligned}$$

Note that  $m_0^*(\tilde{x})h_0^*(\tilde{x}) = [E(Y^*|\tilde{x}, T_y = 1) - E(Y^*|T_y = 1)][E(Z^*|\tilde{x}, T_z = 1) - E(Z^*|T_z = 1)]$ .

It implies that

$$\begin{aligned}\phi(\tilde{o}, \mathcal{P}) &= \frac{\mathbb{I}_{T_y}(1)}{\Pr(T_y = 1)} [\tilde{y}^* - E(Y^*|\tilde{x}, T_y = 1)][E(Z^*|\tilde{x}, T_z = 1) - E(Z^*|T_z = 1)] \\ &\quad + \frac{\mathbb{I}_{T_z}(1)}{\Pr(T_z = 1)} [\tilde{z}^* - E(Z^*|\tilde{x}, T_z = 1)][E(Y^*|\tilde{x}, T_y = 1) - E(Y^*|T_y = 1)] \\ &\quad + [E(Y^*|\tilde{x}, T_y = 1) - E(Y^*|T_y = 1)][E(Z^*|\tilde{x}, T_z = 1) - E(Z^*|T_z = 1)] - \Psi(\mathcal{P}).\end{aligned}\tag{S.1}$$

Since  $\phi(O, \mathcal{P})$  has finite variance, we conclude that the EIF for  $I$  is

$$\begin{aligned}\phi(O, \mathcal{P}) &= \frac{\mathbb{I}_{T_y}(1)}{\Pr(T_y = 1)} [Y^* - E(Y^*|X, T_y = 1)][E(Z^*|X, T_z = 1) - E(Z^*|T_z = 1)] \\ &\quad + \frac{\mathbb{I}_{T_z}(1)}{\Pr(T_z = 1)} [Z^* - E(Z^*|X, T_z = 1)][E(Y^*|X, T_y = 1) - E(Y^*|T_y = 1)] \\ &\quad + [E(Y^*|X, T_y = 1) - E(Y^*|T_y = 1)][E(Z^*|X, T_z = 1) - E(Z^*|T_z = 1)] - \Psi(\mathcal{P}).\end{aligned}$$

**Proof of Theorem 2:** Let  $\epsilon = Y - m(X)$  and  $\eta = Z - h(X)$ . Note that

$$\begin{aligned}G_1 &= \frac{1}{N_y} \sum_{i=1}^{N_y} [Y_i - \hat{m}(X_i)][\hat{h}(X_i) - \bar{Z}_N] \\ &= \frac{1}{N_y} \sum_{i=1}^{N_y} [\epsilon_i + m(X_i) - \tilde{m}(X_i) + \tilde{m}(X_i) - \hat{m}(X_i)][\hat{h}(X_i) - \tilde{h}(X_i) + \tilde{h}(X_i) - EZ + EZ - \bar{Z}_N] \\ &= \frac{1}{N_y} \sum_{i=1}^{N_y} [\epsilon_i + m(X_i) - \tilde{m}(X_i)][\tilde{h}(X_i) - EZ] + \frac{1}{N_y} \sum_{i=1}^{N_y} [\tilde{m}(X_i) - \hat{m}(X_i)][\tilde{h}(X_i) - EZ] \\ &\quad + \frac{1}{N_y} \sum_{i=1}^{N_y} \epsilon_i [\hat{h}(X_i) - \tilde{h}(X_i)] + \frac{1}{N_y} \sum_{i=1}^{N_y} [m(X_i) - \tilde{m}(X_i)][\hat{h}(X_i) - \tilde{h}(X_i)] \\ &\quad + \frac{1}{N_y} \sum_{i=1}^{N_y} [\tilde{m}(X_i) - \hat{m}(X_i)][\hat{h}(X_i) - \tilde{h}(X_i)] + [EZ - \bar{Z}_N] \frac{1}{N_y} \sum_{i=1}^{N_y} [\epsilon_i + m(X_i) - \tilde{m}(X_i)] \\ &\quad + [EZ - \bar{Z}_N] \frac{1}{N_y} \sum_{i=1}^{N_y} [\tilde{m}(X_i) - \hat{m}(X_i)] := \sum_{i=1}^8 G_{1i}.\end{aligned}$$

For the term  $G_{12}$ , by Cauchy-Schwartz inequality, we have

$$\begin{aligned}&\frac{1}{N_y} \sum_{i=1}^{N_y} [\tilde{m}(X_i) - \hat{m}(X_i)][\tilde{h}(X_i) - EZ] \\ &\leq \left( \frac{1}{N_y} \sum_{i=1}^{N_y} [\tilde{m}(X_i) - \hat{m}(X_i)]^2 \right)^{1/2} \left( \frac{1}{N_y} \sum_{i=1}^{N_y} [\tilde{h}(X_i) - EZ]^2 \right)^{1/2} = o_p(1),\end{aligned}$$

where the last equation holds under the conditions  $E[\tilde{h}(X_i) - EZ]^2 < \infty$  and  $E[\hat{h}(X_i) - h(X_i)]^2 = o(1)$ . Similarly, due to the consistencies of  $\hat{m}(X_i), \hat{h}(X_i)$  to  $\tilde{m}(X_i), \tilde{h}(X_i)$ , respectively, we conclude that

$$\begin{aligned} G_1 &= \frac{1}{N_y} \sum_{i=1}^{N_y} [\epsilon_i + m(X_i) - \tilde{m}(X_i)][\tilde{h}(X_i) - EZ] + o_p(1) \\ &= E\{[m(X) - \tilde{m}(X)][\tilde{h}(X) - EZ]\} + o_p(1), \end{aligned}$$

The last equation follows from the fact that  $E\{\epsilon[\tilde{h}(X_i) - EZ]\} = 0$ . Similarly for the second term of  $\tilde{I}_N$ , we have  $G_2 = E\{[\tilde{m}(X) - EY][h(X) - \tilde{h}(X)]\} + o_p(1)$ .

For the third term of  $\tilde{I}_N$ , note that

$$\begin{aligned} G_3 &= \frac{1}{N} \sum_{i=1}^N [\hat{m}(X_i) - \bar{Y}_N][\hat{h}(X_i) - \bar{Z}_N] \\ &= \frac{1}{N} \sum_{i=1}^N [\hat{m}(X_i) - \tilde{m}(X_i) + \tilde{m}(X_i) - EY + EY - \bar{Y}_N][\hat{h}(X_i) - \tilde{h}(X_i) + \tilde{h}(X_i) - EZ + EZ - \bar{Z}_N] \\ &= \frac{1}{N} \sum_{i=1}^N [\tilde{m}(X_i) - EY][\tilde{h}(X_i) - EZ] + o_p(1) \\ &= E[\tilde{m}(X) - EY][\tilde{h}(X) - EZ] + o_p(1). \end{aligned}$$

The third equation holds due to the consistencies of the estimators.

In sum, we have

$$\tilde{I}_N = G_1 + G_2 + G_3 = E[\tilde{m}(X_i) - m(X_i)][h(X_i) - \tilde{h}(X_i)] + I + o_p(1).$$

Then the Theorem follows.

**Proof of Theorem 3:** Note that the proof of this theorem is a special case of that of Theorem 6 with  $g_1(x) = g_2(x) = x$ . Hence we omit the detail.

**Proof of Theorem 4:** If  $(\hat{\sigma}^2 - \sigma^2)/\sigma^2 = o_p(1)$  holds, note that

$$\frac{I_n^* - I}{\sigma} \xrightarrow{d} N(0, 1),$$

which implies

$$\frac{I_n^* - I}{\hat{\sigma}} \xrightarrow{d} N(0, 1).$$

Hence we can finish the proof.

In the following, we aim to show that  $(\hat{\sigma}^2 - \sigma^2)/\sigma^2 = o_p(1)$ . Denote

$$\delta_i - n^{-1}I = \frac{1}{n_y}\epsilon_i^*I(i \in \mathcal{D}_{2y}) + \frac{1}{n_z}\eta_i^*I(i \in \mathcal{D}_{2z}) + \frac{1}{n}\xi_i^*,$$

and  $\tilde{K}_1 = \sum_{i \in \mathcal{D}_2} (\delta_i - n^{-1}I)^2$ , where  $\epsilon_i^* = \epsilon_i[h(X_i) - EZ]$ ,  $\eta_i^* = \eta_i[m(X_i) - EY]$ , and  $\xi_i^* = [m(X_i) - EY][h(X_i) - EZ] - I$ . Similarly, we can define  $\tilde{K}_2$ . Denote

$$\tilde{\sigma}^2 = \frac{\tilde{K}_1 + \tilde{K}_2}{4}.$$

We have

$$\frac{\hat{\sigma}^2 - \sigma^2}{\sigma^2} = \frac{\tilde{\sigma}^2 - \sigma^2}{\sigma^2} + \frac{\hat{\sigma}^2 - \tilde{\sigma}^2}{\sigma^2}. \quad (\text{S.2})$$

We first consider the first term. Note that  $E(\tilde{\sigma}^2 - \sigma^2) = 0$ , and

$$\text{Var}(\tilde{\sigma}^2 - \sigma^2) \lesssim \text{Var}(\tilde{K}_1) + \text{Var}(\tilde{K}_2).$$

We have

$$\text{Var}(\tilde{K}_1) \lesssim E\left[\sum_{i \in \mathcal{D}_2} (\delta_i - n^{-1}I)^4\right] \lesssim \frac{1}{n_y^3}E(\epsilon_i^{*4}) + \frac{1}{n_z^3}E(\eta_i^{*4}) + \frac{1}{n^3}E(\xi_i^{*4}),$$

and  $\text{Var}(\tilde{K}_2) \lesssim \frac{1}{n_y^3}E(\epsilon_i^{*4}) + \frac{1}{n_z^3}E(\eta_i^{*4}) + \frac{1}{n^3}E(\xi_i^{*4})$ , which implies that

$$\tilde{\sigma}^2 - \sigma^2 = O_p\left(\frac{1}{n_y^{3/2}} + \frac{1}{n_z^{3/2}}\right).$$

Since

$$\sigma^2 = \frac{1}{2n_y}E(\epsilon_i^{*2}) + \frac{1}{2n_z}E(\eta_i^{*2}) + \frac{1}{2n}E(\xi_i^{*2}) + \frac{N_0}{N_y N_z}E[\epsilon^* \eta^*] = O_p\left(\frac{1}{n_y} + \frac{1}{n_z}\right),$$

It follows that

$$\frac{\tilde{\sigma}^2 - \sigma^2}{\sigma^2} = o_p(1).$$

Next, we turn to consider the bound for  $(\hat{\sigma}^2 - \tilde{\sigma}^2)/\sigma^2$ . Note that

$$\frac{\hat{\sigma}^2 - \tilde{\sigma}^2}{\sigma^2} = \frac{K_1 - \tilde{K}_1}{4\sigma^2} + \frac{K_2 - \tilde{K}_2}{4\sigma^2}.$$

We can rewrite  $K_1 - \tilde{K}_1$  as

$$\begin{aligned}
K_1 - \tilde{K}_1 &= \sum_{i \in \mathcal{D}_2} (\hat{\delta}_i - n^{-1}I_n)^2 - \sum_{i \in \mathcal{D}_2} (\delta_i - n^{-1}I)^2 \\
&= \sum_{i \in \mathcal{D}_2} (\hat{\delta}_i - n^{-1}I_n - \delta_i + n^{-1}I)^2 + 2 \sum_{i \in \mathcal{D}_2} (\delta_i - n^{-1}I) \sum_{i \in \mathcal{D}_2} (\hat{\delta}_i - n^{-1}I_n - \delta_i + n^{-1}I) \\
&\leq \sum_{i \in \mathcal{D}_2} (\hat{\delta}_i - n^{-1}I_n - \delta_i + n^{-1}I)^2 + 2\sqrt{\tilde{K}_1} \sqrt{\sum_{i \in \mathcal{D}_2} (\hat{\delta}_i - n^{-1}I_n - \delta_i + n^{-1}I)^2} \\
&=: K_{11} + 2K_{12}.
\end{aligned}$$

For the term  $K_{11}$ , we have

$$\sum_{i \in \mathcal{D}_2} (\hat{\delta}_i - n^{-1}I_n - \delta_i + n^{-1}I)^2 \leq 2n^{-1}(I_n - I)^2 + 2 \sum_{i \in \mathcal{D}_2} (\hat{\delta}_i - \delta_i)^2.$$

By the asymptotic normality of  $I_n$ , we have  $(I_n - I)^2 = O_p(2\sigma^2)$ , which implies that  $n^{-1}(I_n - I)^2/4\sigma^2 = o_p(1)$ .

Hence, it is left to show that  $\sum_{i \in \mathcal{D}_2} (\hat{\delta}_i - \delta_i)^2/4\sigma^2 = o_p(1)$ . Note that

$$\begin{aligned}
\sum_{i \in \mathcal{D}_2} (\hat{\delta}_i - \delta_i)^2 &\lesssim \frac{1}{n_y^2} \sum_{i \in \mathcal{D}_{2y}} \{[Y_i - \hat{m}_{\mathcal{D}_1}(X_i)][\hat{h}_{\mathcal{D}_1}(X_i) - \bar{Z}_n] - [Y_i - m(X_i)][h(X_i) - EZ]\}^2 \\
&\quad + \frac{1}{n_z^2} \sum_{i \in \mathcal{D}_{2z}} \{[\hat{m}_{\mathcal{D}_1}(X_i) - \bar{Y}_n][Z_i - \hat{h}_{\mathcal{D}_1}(X_i)] - [m(X_i) - EY][Z_i - h(X_i)]\}^2 \\
&\quad + \frac{1}{n^2} \sum_{i \in \mathcal{D}_2} \{[\hat{m}_{\mathcal{D}_1}(X_i) - \bar{Y}_n][\hat{h}_{\mathcal{D}_1}(X_i) - \bar{Z}_n] - [m(X_i) - EY][h(X_i) - EZ]\}^2 \\
&=: K_{111} + K_{112} + K_{113}.
\end{aligned}$$

We first consider the bound of the term  $K_{111}$ . Note that

$$\begin{aligned}
K_{111} &= \frac{1}{n_y^2} \sum_{i \in \mathcal{D}_{2y}} \{[Y_i - \hat{m}_{\mathcal{D}_1}(X_i)][\hat{h}_{\mathcal{D}_1}(X_i) - \bar{Z}_n] - [Y_i - m(X_i)][h(X_i) - EZ]\}^2 \\
&\lesssim_P \frac{1}{n_y^2} \sum_{i \in \mathcal{D}_{2y}} \epsilon_i^2 [\hat{h}_{\mathcal{D}_1}(X_i) - h(X_i)]^2 + [EZ - \bar{Z}_n]^2 \frac{1}{n_y^2} \sum_{i \in \mathcal{D}_{2y}} \epsilon_i^2 \\
&\quad + \frac{1}{n_y^2} \sum_{i \in \mathcal{D}_{2y}} [\hat{m}_{\mathcal{D}_1}(X_i) - m(X_i)]^2 [h(X_i) - EZ]^2 + \frac{1}{n_y^2} \sum_{i \in \mathcal{D}_{2y}} [\hat{m}_{\mathcal{D}_1}(X_i) - m(X_i)]^2 [\hat{h}_{\mathcal{D}_1}(X_i) - h(X_i)]^2 \\
&\quad + [EZ - \bar{Z}_n]^2 \frac{1}{n_y^2} \sum_{i \in \mathcal{D}_{2y}} [\hat{m}_{\mathcal{D}_1}(X_i) - m(X_i)]^2.
\end{aligned}$$

Based on the fact that  $[EZ - \bar{Z}_n]^2 = O_p(n_z^{-1})$  and under Conditions 2.1–2.4, it is easily

to show that

$$E(|K_{111}|) = o_p\left(\frac{1}{n_y}\right),$$

which follows that  $K_{111} = o_p(n_y^{-1})$ .

Similarly, we can obtain that

$$K_{112} = o_p\left(\frac{1}{n_z}\right), \text{ and } K_{113} = o_p\left(\frac{1}{n}\right).$$

It follows that

$$\frac{\sum_{i \in \mathcal{D}_2} (\hat{\delta}_i - \delta_i)^2}{4\sigma^2} = o_p(1),$$

which implies that  $K_{11}/4\sigma^2 = o_p(1)$ .

Similarly as the discussion of  $\tilde{\sigma}^2$ , we can show that

$$\frac{\tilde{K}_1}{4\sigma^2} = o_p(1).$$

Hence, for the term  $K_{12}$ , we have

$$\frac{K_{12}}{4\sigma^2} = \sqrt{\frac{\tilde{K}_1}{4\sigma^2}} \sqrt{\frac{K_{11}}{4\sigma^2}} = o_p(1).$$

Based on the above results, it follows that

$$(K_1 - \tilde{K}_1)/4\sigma^2 = o_p(1).$$

Similarly, we can show that

$$(K_2 - \tilde{K}_2)/4\sigma^2 = o_p(1).$$

So that we finish the proof.

***Proof of Proposition 3.1:*** Similarly, we can rewrite  $\rho$  as

$$\rho = \Psi_1(\mathcal{P}) = \frac{\text{Cov}[m(X), h(X)]}{\sqrt{\text{Var}[m(X)]\text{Var}[h(X)]}}.$$

Consider the same parametric submodel,

$$\mathcal{P}_t = t\tilde{\mathcal{P}} + (1-t)\mathcal{P},$$

where  $t \in [0, 1]$ . Hence, the efficient influence function(EIF) for  $\rho$  at observation  $\tilde{o}$  directly as

$$\phi_1(\tilde{o}, \mathcal{P}) = \frac{d\Psi_1(\mathcal{P}_t)}{dt}\Big|_{t=0} = \frac{\phi(\tilde{o}, \mathcal{P})}{\sqrt{B_0^y B_0^z}} - \frac{\Psi_1(\mathcal{P})}{2B_0^y B_0^z} \partial_t(B_t^y B_t^z),$$

where  $\phi(\tilde{o}, \mathcal{P})$  is the EIF for  $I$ ,  $B_t^y = E_{\mathcal{P}_t}\{[E_{\mathcal{P}_t}(Y^*|X, T_y = 1) - E_{\mathcal{P}_t}(Y^*|T_y = 1)]^2\}$ , and  $B_0^y = Var(E[Y^*|X, T_y = 1])$ , and the definition of  $B_t^z$  is similar. Similarly, as the arguments in Theorem 2, we can show that  $\partial_t B_t^u$  equals to

$$\begin{aligned} \phi_u(\tilde{o}, \mathcal{P}) &= 2 \frac{\mathbb{I}_{\tilde{t}_u}(T_u = 1)}{P(T_u = 1)} [\tilde{u}^* - E(U^*|\tilde{x}, T_u = 1)][E(U^*|\tilde{x}, T_u = 1) - E(U^*|T_u = 1)] \\ &\quad + [E(U^*|\tilde{x}, T_u = 1) - E(U^*|T_u = 1)]^2 - B_0^u. \end{aligned}$$

By the chain rule and the quotient rule for derivatives, we obtain

$$\begin{aligned} \phi_1(\tilde{o}, \mathcal{P}) &= \frac{\phi(\tilde{o}, \mathcal{P})}{\sqrt{B_0^y B_0^z}} - \frac{\Psi_1(\mathcal{P})}{2B_0^y B_0^z} [\phi_y(\tilde{o}, \mathcal{P}) B_0^z + B_0^y \phi_z(\tilde{o}, \mathcal{P})] \\ &= \frac{S_{yz}}{\sqrt{B_0^y B_0^z}} - \rho \frac{S_{yy}}{2B_0^y} - \rho \frac{S_{zz}}{2B_0^z}. \end{aligned}$$

Note that the variance of  $\phi_1(O, \mathcal{P})$  is finite, which implies that the EIF for  $\rho$  is  $\phi_1(O, \mathcal{P})$ .

**Proof of Theorem 5:** Before giving the proof, a necessary lemma is presented.

**Lemma 1.1** *Suppose Conditions 2.1–2.2 are satisfied. The asymptotically linear representation for  $\hat{B}_0^y$  and  $\hat{B}_0^z$  respectively are*

$$\begin{aligned} \hat{B}_0^y - B_0^y &= \sum_{i \in \mathcal{D}_2} S_{yy,i}^2 + o_p\left(\frac{1}{\sqrt{n}} + \frac{1}{\sqrt{n_y}}\right), \\ \hat{B}_0^z - B_0^z &= \sum_{i \in \mathcal{D}_2} S_{zz,i}^2 + o_p\left(\frac{1}{\sqrt{n}} + \frac{1}{\sqrt{n_z}}\right). \end{aligned}$$

Here

$$S_{yy,i}^2 = \frac{2}{n_y} \epsilon_i [m(X_i) - EY] \mathbb{I}(T_{y,i} = 1) + \frac{1}{n} \{[m(X_i) - EY]^2 - B_0^y\},$$

and

$$S_{zz,i}^2 = \frac{2}{n_z} \eta_i [h(X_i) - EZ] \mathbb{I}(T_{z,i} = 1) + \frac{1}{n} \{[h(X_i) - EZ]^2 - B_0^z\}.$$

**Proof of Lemma 1.1:** The proof of this lemma is similar to that of Theorem 3 and thus omitted here.

Note that

$$\begin{aligned}
\rho_n - \rho &= \left( \frac{I_n}{\sqrt{\hat{B}_0^y \hat{B}_0^z}} - \frac{I}{\sqrt{B_0^y B_0^z}} \right) \\
&= \frac{(I_n - I)}{\sqrt{B_0^y B_0^z}} + I \left( \frac{1}{\sqrt{\hat{B}_0^y \hat{B}_0^z}} - \frac{1}{\sqrt{B_0^y B_0^z}} \right) + (I_n - I) \left( \frac{1}{\sqrt{\hat{B}_0^y \hat{B}_0^z}} - \frac{1}{\sqrt{B_0^y B_0^z}} \right) \\
&=: C_1 + C_2 + C_3.
\end{aligned}$$

According to the proof of Theorem 3, we have

$$C_1 = \sum_{i \in \mathcal{D}_2} \frac{S_{yz,i}}{\sqrt{B_0^y B_0^z}} + o_p \left( \frac{1}{\sqrt{n_z}} + \frac{1}{\sqrt{n_y}} \right),$$

where

$$S_{yz,i} = \frac{1}{n_y} \epsilon_i [h(X_i) - EZ] \mathbb{I}(T_{y,i} = 1) + \frac{1}{n_z} \eta_i [m(X_i) - EY] I(D_{z,i} = 1) + \frac{1}{n} [m(X_i) - EY] [h(X_i) - EZ].$$

Through the Taylor series expansion, we have

$$\begin{aligned}
\frac{1}{\sqrt{\hat{B}_0^y \hat{B}_0^z}} - \frac{1}{\sqrt{B_0^y B_0^z}} &= -\frac{1}{2} (B_0^y B_0^z)^{-3/2} B_0^z (\hat{B}_0^y - B_0^y) - \frac{1}{2} (B_0^y B_0^z)^{-3/2} B_0^y (\hat{B}_0^z - B_0^z) \\
&\quad + o_p(|\hat{B}_0^y - B_0^y|^2 + |\hat{B}_0^z - B_0^z|^2).
\end{aligned}$$

From Lemma 1.1, it follows that

$$\begin{aligned}
\frac{1}{\sqrt{\hat{B}_0^y \hat{B}_0^z}} - \frac{1}{\sqrt{B_0^y B_0^z}} &= -\frac{1}{2} (B_0^y B_0^z)^{-3/2} B_0^z (\hat{B}_0^y - B_0^y) - \frac{1}{2} (B_0^y B_0^z)^{-3/2} B_0^y (\hat{B}_0^z - B_0^z) + o_p \left( \frac{1}{\sqrt{n_z}} + \frac{1}{\sqrt{n_y}} \right) \\
&= -\frac{(B_0^y B_0^z)^{-3/2}}{2} \sum_{i \in \mathcal{D}_2} \{B_0^z S_{yy,i} + B_0^y S_{zz,i}\} + o_p \left( \frac{1}{\sqrt{n_z}} + \frac{1}{\sqrt{n_y}} \right).
\end{aligned}$$

Thus,

$$C_2 = -\frac{\rho}{2B_0^y B_0^z} \sum_{i \in \mathcal{D}_2} \{B_0^z S_{yy,i} + B_0^y S_{zz,i}\} + o_p \left( \frac{1}{\sqrt{n_z}} + \frac{1}{\sqrt{n_y}} \right).$$

Also note that  $I_n - I = o_p(1)$ . Hence it can be easily obtained that  $C_3 = o_p \left( \frac{1}{\sqrt{n_z}} + \frac{1}{\sqrt{n_y}} \right)$ .

Combining the above results, we then conclude that

$$\rho_n - \rho = \sum_{i \in \mathcal{D}_2} \frac{S_{yz,i}}{\sqrt{B_0^y B_0^z}} - \rho \frac{S_{yy,i}}{2B_0^y} - \rho \frac{S_{zz,i}}{2B_0^z} + o_p \left( \frac{1}{\sqrt{n_z}} + \frac{1}{\sqrt{n_y}} \right).$$

Similarly for  $\rho'_n$ , we have

$$\rho'_n - \rho = \sum_{i \in \mathcal{D}_1} \frac{S_{yz,i}}{\sqrt{B_0^y B_0^z}} - \rho \frac{S_{yy,i}}{2B_0^y} - \rho \frac{S_{zz,i}}{2B_0^z} + o_p \left( \frac{1}{\sqrt{n_z}} + \frac{1}{\sqrt{n_y}} \right).$$

Clearly,  $\rho_n$  and  $\rho'_n$  are asymptotically independent. Then we conclude that

$$\rho_n^* - \rho = \sum_{i \in \mathcal{D}} \frac{S_{yz,i}^*}{\sqrt{B_0^y B_0^z}} - \rho \frac{S_{yy,i}^*}{2B_0^y} - \rho \frac{S_{zz,i}^*}{2B_0^z} + o_p \left( \frac{1}{\sqrt{N_z}} + \frac{1}{\sqrt{N_y}} \right).$$

Here

$$\begin{aligned} S_{yz,i}^* &= \frac{1}{N_y} \epsilon_i [h(X_i) - EZ] \mathbb{I}(T_{y,i} = 1) + \frac{1}{N_z} \eta_i [m(X_i) - EY] I(D_{z,i} = 1) \\ &\quad + \frac{1}{N} \{ [m(X_i) - EY][h(X_i) - EZ] - I \}, \end{aligned}$$

and  $S_{yy,i}^*$  and  $S_{zz,i}^*$  are similarly defined.

**Proof of Proposition 4.1:** We first rewrite  $I$  as

$$I = \Psi(\mathcal{P}) = E_{\mathcal{P}} \{ g_1^*(X) g_2^*(X) \},$$

where  $g_1^*(X) = g_1[E_{\mathcal{P}}(Y^*|X, T_y = 1)] - E_{\mathcal{P}}\{g_1[E_{\mathcal{P}}(Y^*|X, T_y = 1)]\}$  and  $g_2^*(X) = g_2[E_{\mathcal{P}}(Z^*|X, T_z = 1)] - E_{\mathcal{P}}\{g_2[E_{\mathcal{P}}(Z^*|X, T_z = 1)]\}$ . Consider the same parametric submodel indexed by  $t$ , i.e.

$$\mathcal{P}_t = t\tilde{\mathcal{P}} + (1-t)\mathcal{P},$$

where  $t \in [0, 1]$ , and  $\tilde{\mathcal{P}}$  is a point mass at a single observation  $\tilde{o}$ . So that the efficient influence function (EIF) for  $I$  at observation  $\tilde{o}$  directly as

$$\phi(\tilde{o}, \mathcal{P}) = \frac{d\Psi(\mathcal{P}_t)}{dt} \Big|_{t=0} = E_{\mathcal{P}} \{ \partial_t [g_{1t}^*(X) g_{2t}^*(X)] \} + \partial_t E_{\mathcal{P}_t} \{ g_1^*(X) g_2^*(X) \}.$$

where  $g_{1t}^*(X) = g_1[E_{\mathcal{P}_t}(Y^*|X, T_y = 1)] - E_{\mathcal{P}_t}\{g_1[E_{\mathcal{P}_t}(Y^*|X, T_y = 1)]\}$  and  $g_{2t}^*(X) = g_2[E_{\mathcal{P}_t}(Z^*|X, T_z = 1)] - E_{\mathcal{P}_t}\{g_2[E_{\mathcal{P}_t}(Z^*|X, T_z = 1)]\}$ .

Firstly, we focus on the term  $\partial_t g_{1t}^*$ . Note that

$$\begin{aligned} \partial_t g_{1t}^*(X) &= \partial_t \left[ g_1[E_{\mathcal{P}_t}(Y^*|X, T_y = 1)] \right] - \partial_t \left( \int g_1[E_{\mathcal{P}_t}(Y^*|X, T_y = 1)] f_t(X) dX \right) \\ &= g_1'[E_{\mathcal{P}}(Y^*|X, T_y = 1)] \partial_t E_{\mathcal{P}_t}(Y^*|X, T_y = 1) - g_1[E_{\mathcal{P}}(Y^*|\tilde{x}, T_y = 1)] \\ &\quad + E_{\mathcal{P}}(g_1[E_{\mathcal{P}}(Y^*|X, T_y = 1)]) - E_{\mathcal{P}} \left( \partial_t \left[ g_1[E_{\mathcal{P}_t}(Y^*|X, T_y = 1)] \right] \right) =: \psi_1(\tilde{o}, \mathcal{P}). \end{aligned}$$

Similarly, we can get

$$\begin{aligned}
\partial_t g_{2t}^*(X) &= \partial_t \left[ g_2[E_{\mathcal{P}_t}(Z^*|X, T_z = 1)] \right] - \partial_t \left( \int g_2[E_{\mathcal{P}_t}(Z^*|X, T_z = 1)] f_t(X) dX \right) \\
&= g_2'[E_{\mathcal{P}}(Z^*|X, T_z = 1)] \partial_t E_{\mathcal{P}_t}(Z^*|X, T_z = 1) - g_2[E_{\mathcal{P}}(Z^*|\tilde{x}, T_z = 1)] \\
&\quad + E_{\mathcal{P}}(g_2[E_{\mathcal{P}}(Z^*|X, T_z = 1)]) - E_{\mathcal{P}} \left( \partial_t \left[ g_1[E_{\mathcal{P}_t}(Z^*|X, T_z = 1)] \right] \right) =: \psi_2(\tilde{o}, \mathcal{P}).
\end{aligned}$$

By the chain rule and the quotient rule for derivatives, it follows that

$$\begin{aligned}
E_{\mathcal{P}}\{\partial_t[g_{1t}^*(X)g_{2t}^*(X)]\} &= E_{\mathcal{P}}\{\psi_1(\tilde{o}, \mathcal{P})g_2^*(X)\} + E_{\mathcal{P}}\{g_1^*(X)\psi_2(\tilde{o}, \mathcal{P})\} \\
&= E_{\mathcal{P}}\{g_1'[E_{\mathcal{P}}(Y^*|X, T_y = 1)]\partial_t E_{\mathcal{P}_t}(Y^*|X, T_y = 1)g_2^*(X)\} \\
&\quad + E_{\mathcal{P}}\{g_1^*(X)g_2'[E_{\mathcal{P}}(Z^*|X, T_z = 1)]\partial_t E_{\mathcal{P}_t}(Z^*|X, T_z = 1)\}.
\end{aligned}$$

The last equality holds because  $E_{\mathcal{P}}[g_i^*(X)] = 0$ ,  $i = 1, 2$ . According to Theorem 1, we have

$$\partial_t E_{\mathcal{P}_t}(Y^*|X, T_y = 1) = \frac{\mathbb{I}_{(\tilde{x}, \tilde{t}_y)}(X, T_y = 1)}{f(X, T_y = 1)} [\tilde{y}^* - E(Y^*|X, T_y = 1)],$$

which implies that

$$\begin{aligned}
&E_{\mathcal{P}}\{g_1'[E_{\mathcal{P}_t}(Y^*|X, T_y = 1)]\partial_t E_{\mathcal{P}_t}(Y^*|X, T_y = 1)g_2^*(X)\} \\
&= \frac{\mathbb{I}_{\tilde{t}_y}(T_y = 1)}{P(T_y = 1)} g_1'[E_{\mathcal{P}}(Y^*|\tilde{x}, T_y = 1)] [\tilde{y}^* - E(Y^*|\tilde{x}, T_y = 1)] g_2^*(\tilde{x}),
\end{aligned}$$

where the last equation holds because  $T_y \perp X$ .

Similarly, we have

$$\begin{aligned}
&E_{\mathcal{P}}\{g_2'[E_{\mathcal{P}_t}(Z^*|X, T_z = 1)]\partial_t E_{\mathcal{P}_t}(Z^*|X, T_z = 1)g_1^*(X)\} \\
&= \frac{\mathbb{I}_{\tilde{t}_z}(T_z = 1)}{P(T_z = 1)} g_2'[E_{\mathcal{P}}(Z^*|\tilde{x}, T_z = 1)] [\tilde{z}^* - E(Z^*|\tilde{x}, T_z = 1)] g_1^*(\tilde{x}).
\end{aligned}$$

Further, we have

$$\partial_t E_{\mathcal{P}_t}\{g_1^*(X)g_2^*(X)\} = g_1^*(\tilde{x})g_2^*(\tilde{x}) - \Psi(\mathcal{P}).$$

Based on the above results, we obtain

$$\begin{aligned}
\phi(\tilde{o}, \mathcal{P}) &= \frac{d\Psi(\mathcal{P}_t)}{dt} \Big|_{t=0} \\
&= \frac{\mathbb{I}_{\tilde{t}_y}(T_y = 1)}{P(T_y = 1)} g_1'[E_{\mathcal{P}}(Y^*|\tilde{x}, T_y = 1)] [\tilde{y}^* - E(Y^*|\tilde{x}, T_y = 1)] g_2^*(\tilde{x}) \\
&\quad + \frac{\mathbb{I}_{\tilde{t}_z}(T_z = 1)}{P(T_z = 1)} g_2'[E_{\mathcal{P}}(Z^*|\tilde{x}, T_z = 1)] [\tilde{z}^* - E(Z^*|\tilde{x}, T_z = 1)] g_1^*(\tilde{x}) \\
&\quad + g_1^*(\tilde{x})g_2^*(\tilde{x}) - \Psi(\mathcal{P}).
\end{aligned}$$

Note that the variance of  $\phi(O, \mathcal{P})$  is finite, which implies that the EIF for  $I$  is  $\phi(O, \mathcal{P})$ .

Given the EIF of  $I$ , we can get the results of  $\rho$  by using the similar arguments of the proof of Theorem 3.1 and thus omitted here.

**Proof of Theorem 6:** Let

$$\begin{aligned} I_n &= \frac{1}{n_y} \sum_{i \in \mathcal{D}_{2y}} \hat{g}'_{1i} [Y_i - \hat{m}_i] [\hat{g}_{2i} - \bar{g}_2] + \frac{1}{n_z} \sum_{i \in \mathcal{D}_{2z}} \hat{g}'_{2i} [Z_i - \hat{h}_i] [\hat{g}_{1i} - \bar{g}_1] + \frac{1}{n} \sum_{i \in \mathcal{D}_2} [\hat{g}_{2i} - \bar{g}_2] [\hat{g}_{1i} - \bar{g}_1] \\ &=: I_{n1} + I_{n2} + I_{n3}. \end{aligned}$$

For the term  $I_{n1}$ , we have

$$\begin{aligned} I_{n1} &= \frac{1}{n_y} \sum_{i \in \mathcal{D}_{2y}} \hat{g}'_{1i} [Y_i - \hat{m}_i] [\hat{g}_{2i} - \bar{g}_2] \\ &= \frac{1}{n_y} \sum_{i \in \mathcal{D}_{2y}} \hat{g}'_{1i} [\epsilon_i + m_i - \hat{m}_i] [\hat{g}_{2i} - g_{2i} + g_{2i} - E g_2 + E g_2 - \bar{g}_2] \\ &= \frac{1}{n_y} \sum_{i \in \mathcal{D}_{2y}} \hat{g}'_{1i} \epsilon_i (\hat{g}_{2i} - g_{2i}) + \frac{1}{n_y} \sum_{i \in \mathcal{D}_{2y}} \hat{g}'_{1i} \epsilon_i (g_{2i} - E g_2) + \frac{1}{n_y} \sum_{i \in \mathcal{D}_{2y}} \hat{g}'_{1i} \epsilon_i (E g_2 - \bar{g}_2) \\ &\quad + \frac{1}{n_y} \sum_{i \in \mathcal{D}_{2y}} \hat{g}'_{1i} (m_i - \hat{m}_i) (\hat{g}_{2i} - \bar{g}_2) =: \sum_{i=1}^4 D_i. \end{aligned}$$

In the following part, we will show that both  $D_1$  and  $D_3$  are negligible, while both  $D_2$  and  $D_4$  contain the leading terms.

For the term  $D_1$ , it can be rewritten as

$$D_1 = \frac{1}{n_y} \sum_{i \in \mathcal{D}_{2y}} (\hat{g}'_{1i} - g'_{1i}) \epsilon_i (\hat{g}_{2i} - g_{2i}) + \frac{1}{n_y} \sum_{i \in \mathcal{D}_{2y}} g'_{1i} \epsilon_i (\hat{g}_{2i} - g_{2i}) =: D_{11} + D_{12}.$$

For the first term, we have  $E(D_{11}) = 0$ , and

$$E(D_{11}^2 | \mathcal{D}_1) = \frac{1}{n_y^2} \sum_{i \in \mathcal{D}_{2y}} E [\sigma^2(X) (\hat{g}'_{1i} - g'_{1i})^2 (\hat{g}_{2i} - g_{2i})^2 | \mathcal{D}_1].$$

Under the conditions  $|g'_1(m_i) - g'_1(\hat{m}_i)| \leq L|m_i - \hat{m}_i|$  and  $g'_2(\cdot) < C < \infty$ , we have

$$E(D_{11}^2) \lesssim \frac{1}{n_y} E [\sigma^2(X) (\hat{m}_i - m_i)^2 (\hat{h}_i - h_i)^2] = o\left(\frac{1}{n_y}\right),$$

where the last equation holds under the condition  $E [\sigma^2(X) (\hat{m}_i - m_i)^2 (\hat{h}_i - h_i)^2] = o(1)$ .

Further, we can similarly show that  $E(D_{12}) = 0$ , and

$$E(D_{12}^2) \lesssim \frac{1}{n_y} E [\sigma^2(X) (\hat{h}_i - h_i)^2] = o\left(\frac{1}{n_y}\right),$$

when the conditions  $E[(\hat{h}_i - h_i)^4] = o(n_y^{-1})$  and  $g'_2(\cdot) < C < \infty$  are satisfied. It follows that

$$D_1 = D_{11} + D_{12} = o_p\left(\frac{1}{\sqrt{n_y}}\right).$$

For the term  $D_2$ , it can be rewritten as

$$D_2 = \frac{1}{n_y} \sum_{i \in \mathcal{D}_{2y}} (\hat{g}'_{1i} - g'_{1i}) \epsilon_i (g_{2i} - E g_2) + \frac{1}{n_y} \sum_{i \in \mathcal{D}_{2y}} g'_{1i} \epsilon_i (g_{2i} - E g_2)$$

Under the conditions  $|g'_1(m_i) - g'_1(\hat{m}_i)| \leq L|m_i - \hat{m}_i|$  and  $E[\sigma^2(X)(\hat{m}_i - m_i)^2(g_2 - E g_2)^2] = o(1)$ , it can similarly be obtained that

$$D_2 = \frac{1}{n_y} \sum_{i \in \mathcal{D}_{2y}} g'_{1i} \epsilon_i (g_{2i} - E g_2) + o_p\left(\frac{1}{\sqrt{n_y}}\right). \quad (\text{S.3})$$

Now we turn to consider  $E g_2 - \bar{g}_2$ . Under conditions that  $g'_2(\cdot) \leq C < \infty$  and  $E[(h_i - \hat{h}_i)^4] = o_p(n_z^{-1})$ , we have

$$\begin{aligned} E g_2 - \bar{g}_2 &= E g_2 - \frac{1}{n_z} \sum_{i \in \mathcal{D}_{2z}} g_2(h_i) + \frac{1}{n_z} \sum_{i \in \mathcal{D}_{2z}} g_2(h_i) - g_2(\hat{h}_i) \\ &= E g_2 - \frac{1}{n_z} \sum_{i \in \mathcal{D}_{2z}} g_2(h_i) + \frac{1}{n_z} \sum_{i \in \mathcal{D}_{2z}} g'_2(\tilde{h}_i)(h_i - \hat{h}_i) = o_p(n_z^{-1/4}), \end{aligned}$$

where  $\tilde{h}_i$  is between  $h_i$  and  $\hat{h}_i$ . Similarly, we can get  $E g_1 - \bar{g}_1 = o_p(n_y^{-1/4})$ .

For the term  $D_3$ , it can be rewritten as

$$D_3 = (E g_2 - \bar{g}_2) \frac{1}{n_y} \sum_{i \in \mathcal{D}_{2y}} \hat{g}'_{1i} \epsilon_i.$$

Given  $\mathcal{D}_{1y}$ , it can be easily to show that

$$\frac{1}{n_y} \sum_{i \in \mathcal{D}_{2y}} \hat{g}'_{1i} \epsilon_i = O_p\left(\frac{1}{\sqrt{n_y}}\right).$$

Also based on the fact  $E g_2 - \bar{g}_2 = o_p(n_z^{-1/4})$ , we easily get that  $D_3 = o_p(n_y^{-1/2})$ .

So far, we have

$$I_{n1} = \frac{1}{n_y} \sum_{i \in \mathcal{D}_{2y}} g'_{1i} \epsilon_i (g_{2i} - E g_2) + D_4 + o_p\left(\frac{1}{\sqrt{n_y}}\right).$$

Next, we consider the bound for  $D_4$ . Note that

$$\begin{aligned} D_4 &= \frac{1}{n_y} \sum_{i \in \mathcal{D}_{2y}} \hat{g}'_{1i}(m_i - \hat{m}_i)(\hat{g}_{2i} - \bar{g}_2) \\ &= \frac{1}{n_y} \sum_{i \in \mathcal{D}_{2y}} (\hat{g}'_{1i} - g'_{1i})(m_i - \hat{m}_i)(\hat{g}_{2i} - \bar{g}_2) + \frac{1}{n_y} \sum_{i \in \mathcal{D}_{2y}} g'_{1i}(m_i - \hat{m}_i)(\hat{g}_{2i} - \bar{g}_2) \\ &=: D_{41} + D_{42}. \end{aligned}$$

For the term  $D_{41}$ , we have

$$\begin{aligned} D_{41} &= \frac{1}{n_y} \sum_{i \in \mathcal{D}_{2y}} (\hat{g}'_{1i} - g'_{1i})(m_i - \hat{m}_i)(\hat{g}_{2i} - g_{2i}) + \frac{1}{n_y} \sum_{i \in \mathcal{D}_{2y}} (\hat{g}'_{1i} - g'_{1i})(m_i - \hat{m}_i)(g_{2i} - Eg_2) \\ &\quad + (Eg_2 - \bar{g}_2) \frac{1}{n_y} \sum_{i \in \mathcal{D}_{2y}} (\hat{g}'_{1i} - g'_{1i})(m_i - \hat{m}_i). \end{aligned}$$

For the first term,

$$\begin{aligned} &\frac{1}{n_y} \sum_{i \in \mathcal{D}_{2y}} (\hat{g}'_{1i} - g'_{1i})(m_i - \hat{m}_i)(\hat{g}_{2i} - g_{2i}) \\ &\leq \left[ \frac{1}{n_y} \sum_{i \in \mathcal{D}_{2y}} (\hat{g}'_{1i} - g'_{1i})^2 (m_i - \hat{m}_i)^2 \right]^{1/2} \left[ \frac{1}{n_y} \sum_{i \in \mathcal{D}_{2y}} (\hat{g}_{2i} - g_{2i})^2 \right]^{1/2} \\ &\lesssim \left[ \frac{1}{n_y} \sum_{i \in \mathcal{D}_{2y}} (m_i - \hat{m}_i)^4 \right]^{1/2} \left[ \frac{1}{n_y} \sum_{i \in \mathcal{D}_{2y}} (\hat{h}_i - h_i)^2 \right]^{1/2} = o_p \left( \frac{1}{\sqrt{n_y}} \right), \end{aligned}$$

where the last equation holds when  $E[(\hat{m}_i - m_i)^4] = o(n_y^{-1})$  and  $E[(\hat{h}_i - h_i)^4] = (n_z^{-1})$ .

Similarly, we can apply the same arguments to the other two terms. Thus, it follows that

$$D_{41} = o_p \left( \frac{1}{\sqrt{n_y}} \right).$$

Next, we turn to the term  $D_{42}$ . Note that

$$\begin{aligned} D_{42} &= \frac{1}{n_y} \sum_{i \in \mathcal{D}_{2y}} g'_{1i}(m_i - \hat{m}_i)(\hat{g}_{2i} - \bar{g}_2) = \frac{1}{n_y} \sum_{i \in \mathcal{D}_{2y}} g'_{1i}(m_i - \hat{m}_i)(\hat{g}_{2i} - g_{2i}) \\ &\quad + \frac{1}{n_y} \sum_{i \in \mathcal{D}_{2y}} g'_{1i}(m_i - \hat{m}_i)(g_{2i} - Eg_2) + (Eg_2 - \bar{g}_2) \frac{1}{n_y} \sum_{i \in \mathcal{D}_{2y}} g'_{1i}(m_i - \hat{m}_i) =: \sum_{i=1}^3 D_{42i}. \end{aligned}$$

For the first term  $D_{421}$ ,

$$\begin{aligned} |D_{421}| &\leq \frac{1}{n_y} \sum_{i \in \mathcal{D}_{2y}} |g'_{1i}(m_i - \hat{m}_i)(\hat{g}_{2i} - g_{2i})| \\ &\leq \left[ \frac{1}{n_y} \sum_{i \in \mathcal{D}_{2y}} (g'_{1i})^2 (m_i - \hat{m}_i)^2 \right]^{1/2} \left[ \frac{1}{n_y} \sum_{i \in \mathcal{D}_{2y}} (\hat{g}_{2i} - g_{2i})^2 \right]^{1/2} \\ &\lesssim \left[ \frac{1}{n_y} \sum_{i \in \mathcal{D}_{2y}} (m_i - \hat{m}_i)^2 \right]^{1/2} \left[ \frac{1}{n_y} \sum_{i \in \mathcal{D}_{2y}} (\hat{h}_i - h_i)^2 \right]^{1/2}. \end{aligned}$$

Note that under condition 4.3, we have  $E[(\hat{m}_i - m_i)^2] = o(n_y^{-1/2})$  and  $E[(\hat{h}_i - h_i)^2] = o(n_z^{-1/2})$ . It follows that

$$D_{421} = o_p \left( \frac{1}{n_y^{1/4} n_z^{1/4}} \right) = o_p \left( \frac{1}{\sqrt{n_y}} + \frac{1}{\sqrt{n_z}} \right).$$

Similarly, based on  $Eg_2 - \bar{g}_2 = o_p(n_z^{-1/4})$  and  $E[(\hat{m}_i - m_i)^2] = o(n_y^{-1/2})$ , it can be easily obtained that

$$D_{423} = o_p \left( \frac{1}{\sqrt{n_y}} + \frac{1}{\sqrt{n_z}} \right).$$

It follows that

$$D_4 = \frac{1}{n_y} \sum_{i \in \mathcal{D}_{2y}} g'_{1i} (m_i - \hat{m}_i) (g_{2i} - Eg_2) + o_p \left( \frac{1}{\sqrt{n_y}} + \frac{1}{\sqrt{n_z}} \right).$$

Thus, we can conclude that

$$I_{n1} = \frac{1}{n_y} \sum_{i \in \mathcal{D}_{2y}} g'_{1i} \epsilon_i (g_{2i} - Eg_2) + \frac{1}{n_y} \sum_{i \in \mathcal{D}_{2y}} g'_{1i} (m_i - \hat{m}_i) (g_{2i} - Eg_2) + o_p \left( \frac{1}{\sqrt{n_y}} + \frac{1}{\sqrt{n_z}} \right).$$

Similarly, we can get

$$I_{n2} = \frac{1}{n_z} \sum_{i \in \mathcal{D}_{2z}} g'_{2i} \eta (g_{1i} - Eg_1) + \frac{1}{n_z} \sum_{i \in \mathcal{D}_{2z}} g'_{2i} (h_i - \hat{h}_i) (g_{1i} - Eg_1) + o_p \left( \frac{1}{\sqrt{n_y}} + \frac{1}{\sqrt{n_z}} \right).$$

For the term  $I_{n3}$ , we have

$$\begin{aligned} I_{n3} &= \frac{1}{n} \sum_{i \in \mathcal{D}_2} (\hat{g}_{2i} - g_{2i} + g_{2i} - Eg_2 + Eg_2 - \bar{g}_2) (\hat{g}_{1i} - g_{1i} + g_{1i} - Eg_1 + Eg_1 - \bar{g}_1) \\ &= \frac{1}{n} \sum_{i \in \mathcal{D}_2} (g_{2i} - Eg_2) (g_{1i} - Eg_1) + \frac{1}{n} \sum_{i \in \mathcal{D}_2} (\hat{g}_{2i} - g_{2i}) (g_{1i} - Eg_1) + \frac{1}{n} \sum_{i \in \mathcal{D}_2} (\hat{g}_{1i} - g_{1i}) (g_{2i} - Eg_2) \\ &\quad + \frac{1}{n} \sum_{i \in \mathcal{D}_2} (\hat{g}_{2i} - g_{2i}) (\hat{g}_{1i} - g_{1i}) + (Eg_1 - \bar{g}_1) \frac{1}{n} \sum_{i \in \mathcal{D}_2} (\hat{g}_{2i} - g_{2i}) + (Eg_1 - \bar{g}_1) \frac{1}{n} \sum_{i \in \mathcal{D}_2} (g_{2i} - Eg_2) \\ &\quad + (Eg_1 - \bar{g}_1) (Eg_2 - \bar{g}_2) + (Eg_2 - \bar{g}_2) \frac{1}{n} \sum_{i \in \mathcal{D}_2} (\hat{g}_{1i} - g_{1i}) + (Eg_2 - \bar{g}_2) \frac{1}{n} \sum_{i \in \mathcal{D}_2} (g_{1i} - Eg_1) =: \sum_{i=1}^9 I_{n3i}. \end{aligned}$$

For the term  $I_{n34}$ ,

$$\begin{aligned} |I_{n34}| &\leq \frac{1}{n} \sum_{i \in \mathcal{D}_2} |(\hat{g}_{2i} - g_{2i}) (\hat{g}_{1i} - g_{1i})| \leq \left[ \frac{1}{n} \sum_{i \in \mathcal{D}_2} (\hat{g}_{2i} - g_{2i})^2 \right]^{1/2} \left[ \frac{1}{n} \sum_{i \in \mathcal{D}_2} (\hat{g}_{1i} - g_{1i})^2 \right]^{1/2} \\ &\lesssim \left[ \frac{1}{n} \sum_{i \in \mathcal{D}_2} (\hat{h}_i - h_i)^2 \right]^{1/2} \left[ \frac{1}{n} \sum_{i \in \mathcal{D}_2} (\hat{m}_i - m_i)^2 \right]^{1/2} = o_p \left( \frac{1}{n_y^{1/4} n_z^{1/4}} \right) = o_p \left( \frac{1}{\sqrt{n_y}} + \frac{1}{\sqrt{n_z}} \right). \end{aligned}$$

Similarly, it can be easy to show that

$$\frac{1}{n} \sum_{i \in \mathcal{D}_2} (\hat{g}_{1i} - g_{1i}) = o_p(n_y^{-1/4}), \text{ and } \frac{1}{n} \sum_{i \in \mathcal{D}_2} (\hat{g}_{2i} - g_{2i}) = o_p(n_z^{-1/4}).$$

Also, based on the facts that  $Eg_1 - \bar{g}_1 = o_p(n_y^{-1/4})$  and  $Eg_2 - \bar{g}_2 = o_p(n_z^{-1/4})$ , it can be easily to show that

$$\begin{aligned} I_{n35} + I_{n37} + I_{n38} &= (Eg_1 - \bar{g}_1) \frac{1}{n} \sum_{i \in \mathcal{D}_2} (\hat{g}_{2i} - g_{2i}) + (Eg_1 - \bar{g}_1)(Eg_2 - \bar{g}_2) \\ &\quad + (Eg_2 - \bar{g}_2) \frac{1}{n} \sum_{i \in \mathcal{D}_2} (\hat{g}_{1i} - g_{1i}) = o_p \left( \frac{1}{\sqrt{n_y}} + \frac{1}{\sqrt{n_z}} \right). \end{aligned}$$

Further, note that

$$\frac{1}{n} \sum_{i \in \mathcal{D}_2} (g_{2i} - Eg_2) = O_p(n^{-1/2}), \text{ and } \frac{1}{n} \sum_{i \in \mathcal{D}_2} (g_{1i} - Eg_1) = O_p(n^{-1/2}),$$

which implies that

$$I_{n36} + I_{n39} = (Eg_1 - \bar{g}_1) \frac{1}{n} \sum_{i \in \mathcal{D}_2} (g_{2i} - Eg_2) + (Eg_2 - \bar{g}_2) \frac{1}{n} \sum_{i \in \mathcal{D}_2} (g_{1i} - Eg_1) = o_p \left( \frac{1}{\sqrt{n_y}} + \frac{1}{\sqrt{n_z}} \right).$$

Note that by the Taylor series expansion

$$\begin{aligned} I_{n32} &= \frac{1}{n} \sum_{i \in \mathcal{D}_2} (\hat{g}_{2i} - g_{2i})(g_{1i} - Eg_1) \\ &= \frac{1}{n} \sum_{i \in \mathcal{D}_2} g'_2(h_i)(\hat{h}_i - h_i)(g_{1i} - Eg_1) + O_p \left( \frac{1}{n} \sum_{i \in \mathcal{D}_2} (\hat{h}_i - h_i)^2 (g_{1i} - Eg_1) \right) \\ &= \frac{1}{n} \sum_{i \in \mathcal{D}_2} g'_{2i}(\hat{h}_i - h_i)(g_{1i} - Eg_1) + o_p \left( \frac{1}{\sqrt{n_z}} \right). \end{aligned}$$

The last equation holds when  $E[(\hat{h}_i - h_i)^4] = o(n_z^{-1})$  and condition 4.2 are satisfied. Similarly, we can get

$$\begin{aligned} I_{n33} &= \frac{1}{n} \sum_{i \in \mathcal{D}_2} (\hat{g}_{1i} - g_{1i})(g_{2i} - Eg_2) \\ &= \frac{1}{n} \sum_{i \in \mathcal{D}_2} g'_{1i}(\hat{m}_i - m_i)(g_{2i} - Eg_2) + O_p \left( \frac{1}{n} \sum_{i \in \mathcal{D}_2} (\hat{m}_i - m_i)^2 (g_{2i} - Eg_2) \right) \\ &= \frac{1}{n} \sum_{i \in \mathcal{D}_2} g'_{1i}(\hat{m}_i - m_i)(g_{2i} - Eg_2) + o_p \left( \frac{1}{\sqrt{n_y}} \right). \end{aligned}$$

Based on the above results, we can conclude that

$$\begin{aligned}
I_n &= \frac{1}{n_y} \sum_{i \in \mathcal{D}_{2y}} g'_{1i} \epsilon_i (g_{2i} - E g_2) + \frac{1}{n_z} \sum_{i \in \mathcal{D}_{2z}} g'_{2i} \eta (g_{1i} - E g_1) + \frac{1}{n} \sum_{i \in \mathcal{D}_2} (g_{2i} - E g_2)(g_{1i} - E g_1) \\
&+ \frac{1}{n_z} \sum_{i \in \mathcal{D}_{2z}} g'_{2i} (h_i - \hat{h}_i)(g_{1i} - E g_1) + \frac{1}{n} \sum_{i \in \mathcal{D}_2} g'_{2i} (\hat{h}_i - h_i)(g_{1i} - E g_1) \\
&+ \frac{1}{n_y} \sum_{i \in \mathcal{D}_{2y}} g'_{1i} (m_i - \hat{m}_i)(g_{2i} - E g_2) + \frac{1}{n} \sum_{i \in \mathcal{D}_2} g'_{1i} (\hat{m}_i - m_i)(g_{2i} - E g_2) + o_p \left( \frac{1}{\sqrt{n_y}} + \frac{1}{\sqrt{n_z}} \right)
\end{aligned}$$

Denote

$$R_1 = \frac{1}{n_z} \sum_{i \in \mathcal{D}_{2z}} g'_{2i} (h_i - \hat{h}_i)(g_{1i} - E g_1) + \frac{1}{n} \sum_{i \in \mathcal{D}_2} g'_{2i} (\hat{h}_i - h_i)(g_{1i} - E g_1).$$

Further let  $l_i = g'_{2i} (\hat{h}_i - h_i)(g_{1i} - E g_1)$ . Note that

$$R_1 = \frac{1}{n} \sum_{i \in \mathcal{D}_2} l_i - \frac{1}{n_z} \sum_{i \in \mathcal{D}_{2z}} l_i = \frac{n - n_z}{n} \left( \frac{1}{n - n_z} \sum_{i \in \mathcal{D}_2 / \mathcal{D}_{2z}} l_i - \frac{1}{n_z} \sum_{i \in \mathcal{D}_{2z}} l_i \right).$$

Similarly as the discussion in the proof of Theorem 3, it can be obtained that  $E(R_1) = 0$ ,

and

$$\text{Var}(R_1) \leq \frac{2(n - n_z)^2}{n^2} \left( \frac{1}{n - n_z} + \frac{1}{n_z} \right) E(l_i^2).$$

Note that  $E l_i^2 = o(1)$ , we then derive that

$$R_1 = \frac{1}{n_z} \sum_{i \in \mathcal{D}_{2z}} g'_{2i} (h_i - \hat{h}_i)(g_{1i} - E g_1) + \frac{1}{n} \sum_{i \in \mathcal{D}_2} g'_{2i} (\hat{h}_i - h_i)(g_{1i} - E g_1) = o_p \left( \frac{1}{\sqrt{n_z}} \right).$$

Similarly, we can show that

$$\frac{1}{n_y} \sum_{i \in \mathcal{D}_{2y}} g'_{1i} (m_i - \hat{m}_i)(g_{2i} - E g_2) + \frac{1}{n} \sum_{i \in \mathcal{D}_2} g'_{1i} (\hat{m}_i - m_i)(g_{2i} - E g_2) = o_p \left( \frac{1}{\sqrt{n_y}} \right).$$

Thus, we have

$$\begin{aligned}
I_n &= \frac{1}{n_y} \sum_{i \in \mathcal{D}_{2y}} g'_{1i} \epsilon_i (g_{2i} - E g_2) + \frac{1}{n_z} \sum_{i \in \mathcal{D}_{2z}} g'_{2i} \eta (g_{1i} - E g_1) \\
&+ \frac{1}{n} \sum_{i \in \mathcal{D}_2} (g_{2i} - E g_2)(g_{1i} - E g_1) + o_p \left( \frac{1}{\sqrt{n_y}} + \frac{1}{\sqrt{n_z}} \right).
\end{aligned}$$

Similarly for  $I'_n$ , we have:

$$\begin{aligned}
I'_n &= \frac{1}{n_y} \sum_{i \in \mathcal{D}_{1y}} g'_{1i} \epsilon_i (g_{2i} - E g_2) + \frac{1}{n_z} \sum_{i \in \mathcal{D}_{1z}} g'_{2i} \eta (g_{1i} - E g_1) \\
&+ \frac{1}{n} \sum_{i \in \mathcal{D}_1} (g_{2i} - E g_2)(g_{1i} - E g_1) + o_p \left( \frac{1}{\sqrt{n_y}} + \frac{1}{\sqrt{n_z}} \right).
\end{aligned}$$

Based on the above results, we can conclude that

$$I_n^* = \frac{1}{N_y} \sum_{i \in \mathcal{D}_y} g'_{1i} \epsilon_i (g_{2i} - E g_2) + \frac{1}{N_z} \sum_{i \in \mathcal{D}_z} g'_{2i} \eta (g_{1i} - E g_1) + \frac{1}{N} \sum_{i \in \mathcal{D}} (g_{2i} - E g_2) (g_{1i} - E g_1) + o_p \left( \frac{1}{\sqrt{N_y}} + \frac{1}{\sqrt{N_z}} \right).$$

Given the asymptotic results of  $I_n^*$ , we can get the results of  $\rho_n^*$  by using similar arguments of the proof of Theorem 5 and thus omitted here.
